# Supplementary material for: High capacity and rate capability of a layered Li2RuO3cathode utilized in hybrid Na+/Li+batteries
Source: Royal Society of Chemistry journal article supplement (doi:10.1039/c5ta03632a), 2015-01-01
Supplement: c5ta03632a1.pdf [file c5ta03632a1.pdf]

## Supporting Information For

### High capacity and rate capability of 4d layered $\text{Li}_2\text{RuO}_3$ cathode utilized in the hybrid $\text{Na}^+/\text{Li}^+$ batteries

Ye Yao<sup>a,b</sup>, Peilei Yang<sup>a</sup>, Xiaofei Bie<sup>a,c</sup>, Chunzhong Wang<sup>a,b</sup>, Yingjin Wei<sup>a</sup>, Gang  
Chen<sup>a,b</sup> and Fei Du<sup>a,\*</sup>

<sup>a</sup>*Key Laboratory of Physics and Technology for Advanced Batteries (Ministry of Education), College of Physics, Jilin University, Changchun, 130012, People's Republic of China*

<sup>b</sup>*State Key Laboratory of Superhard Materials, Jilin University, Changchun, 130012, People's Republic of China*

<sup>c</sup>*Elements Strategy Initiative for Catalysts and Batteries (ESICB), Kyoto University, Kyoto 615-8520, Japan*

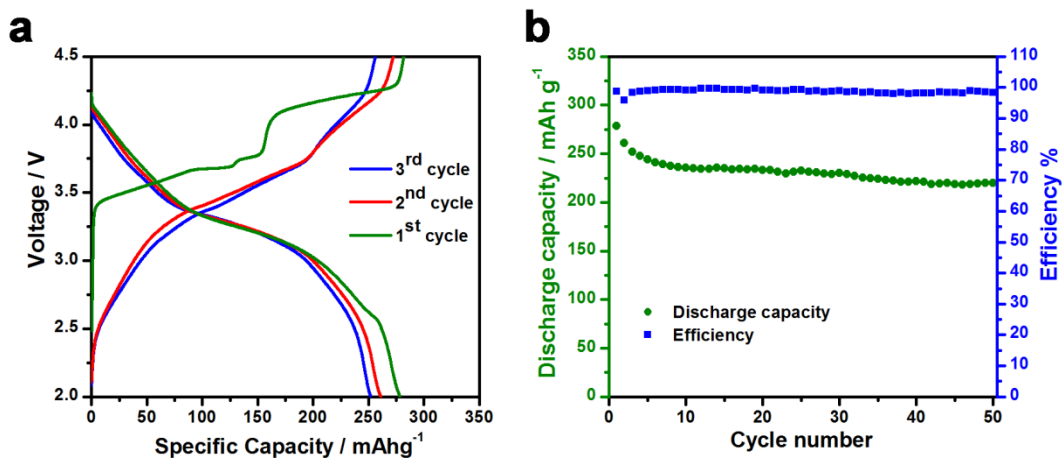

Fig. S1 Galvanostatic charge-discharge profiles of  $\text{Li}_2\text{RuO}_3$  in the LHC for the first three cycles in the voltage region of 2.0 - 4.5 V at the current density of  $0.1 \text{ A g}^{-1}$  (a); its corresponding cycle performance and coulombic efficiency for 50 cycles (b).

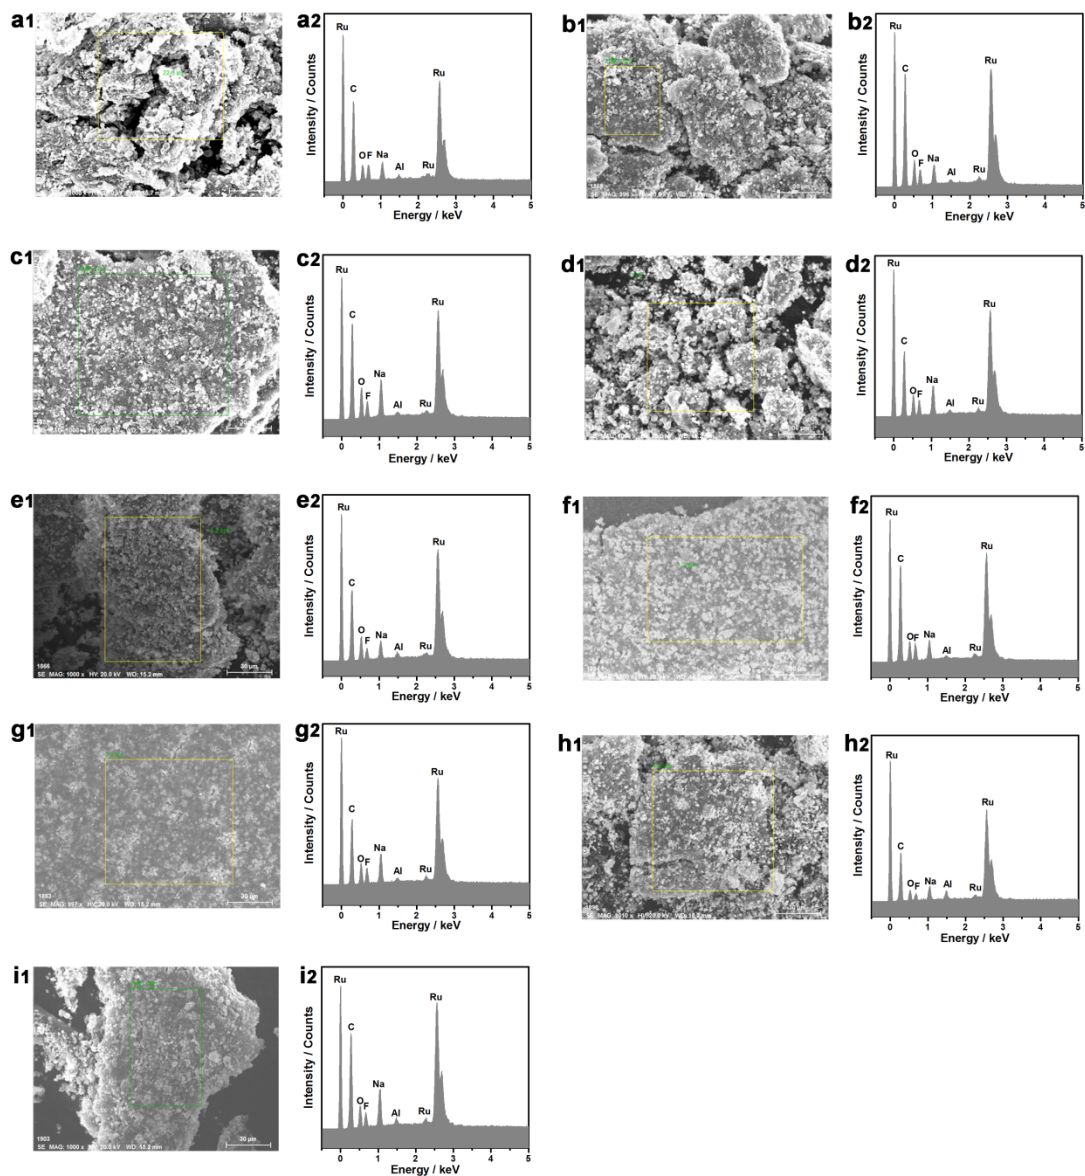

Fig. S2 EDX spectra of  $\text{Li}_2\text{RuO}_3$  after different cycling. Before cycling (a), 1st charge to 4.0V (b), 1st discharge to 2.0V (c), 2nd charge to 4.0V (d), 2nd discharge to 2.0V (e), 10th charge to 4.0V (f), 10th discharge to 2.0V (g), 11th charge to 4.0V (h), 11th discharge to 2.0V (i)

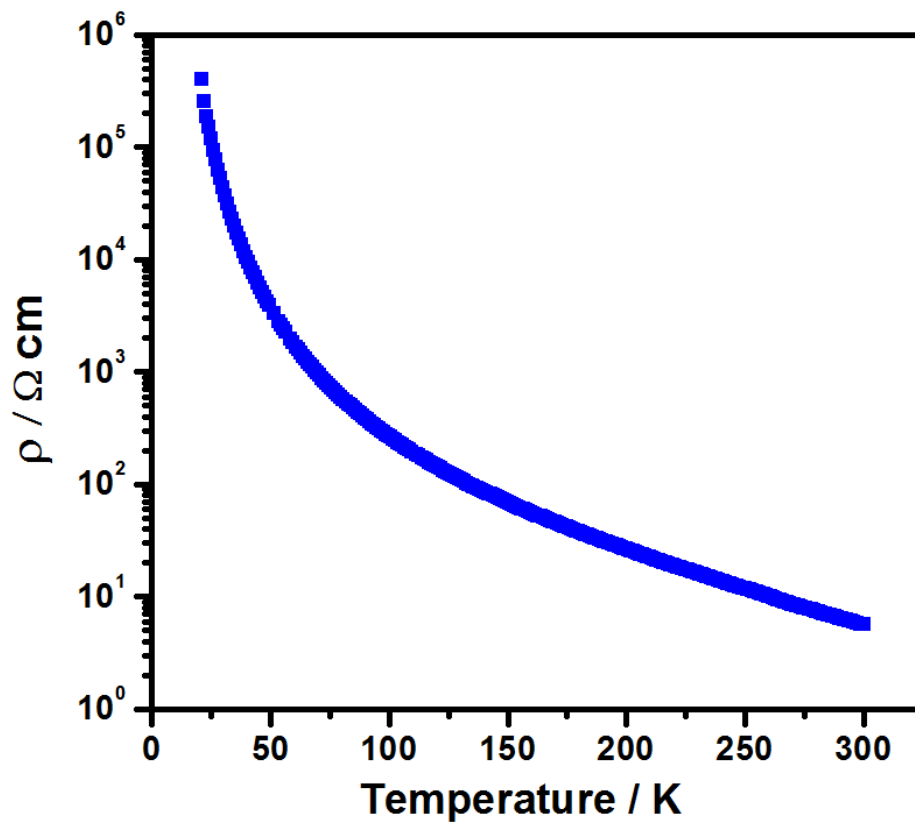

Fig. S3 Temperature dependence of resistivity for  $\text{Li}_2\text{RuO}_3$ .

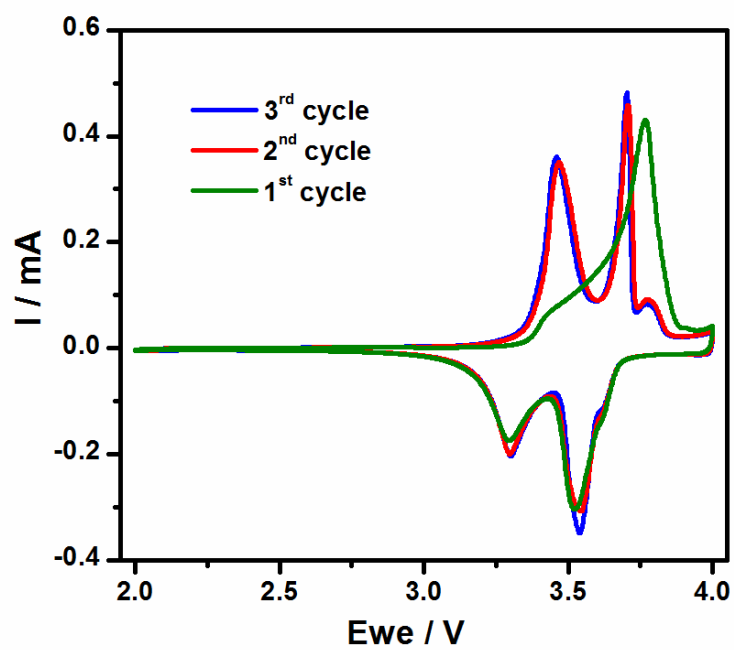

Fig. S4 Cyclic voltammograms of  $\text{Li}_2\text{RuO}_3$  in LHC at a scan rate of  $0.1 \text{ mV s}^{-1}$  between 2.0 and 4.0 V vs.  $\text{Li/Li}^+$
